# Supplementary material for: Assessing stability of gene selection in microarray data analysis
Source: PubMed Central journal article supplement (PMC1403808; doi:10.1186/1471-2105-7-50), 2006-02-01
Supplement: 1471-2105-7-50-S2.pdf [file 1471-2105-7-50-S2.pdf]

# Assessing Stability of Gene Selection in Microarray Data Analysis

SIMULDIST

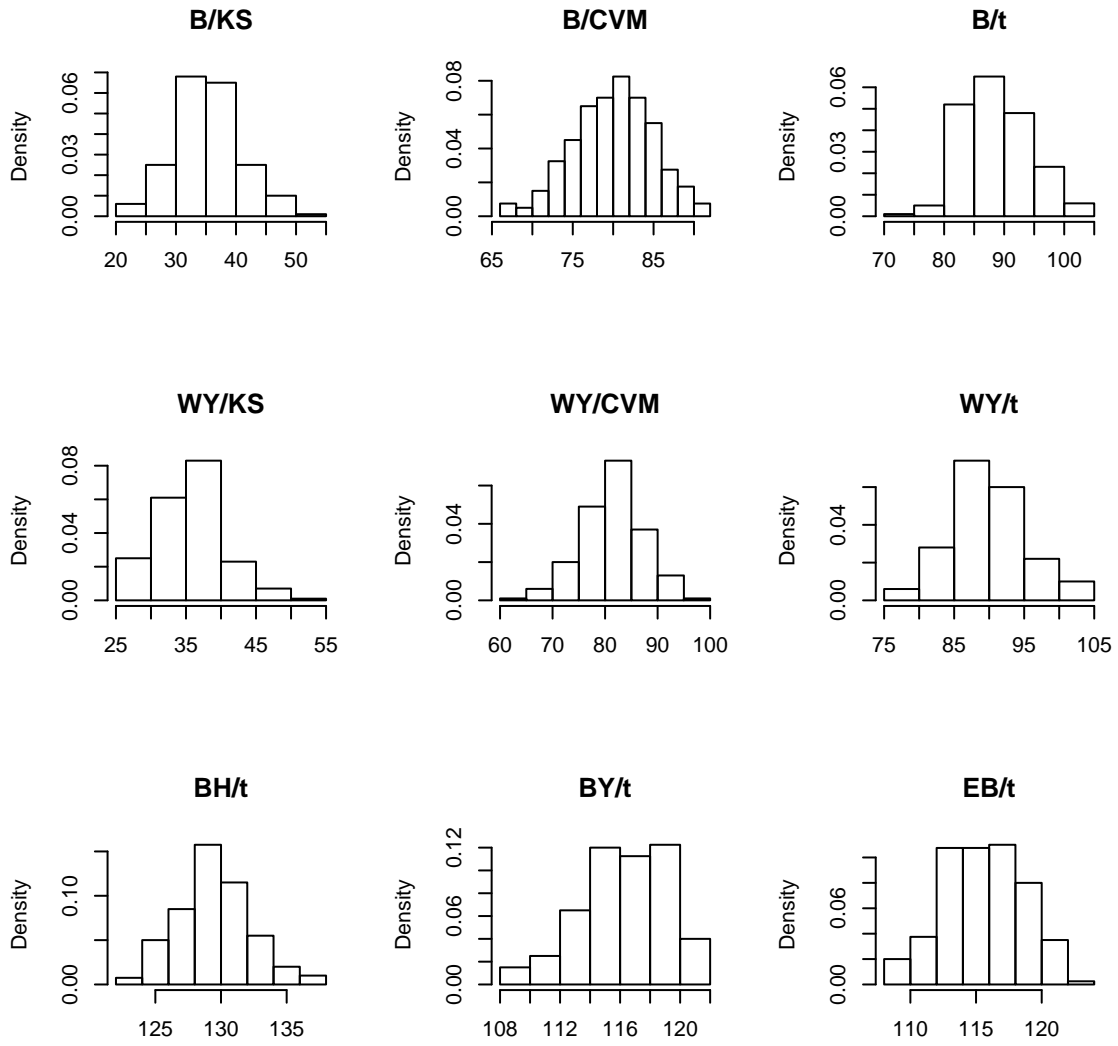

Figure 1: Histograms of the number of selected genes across 200 simulation runs constructed for S15.

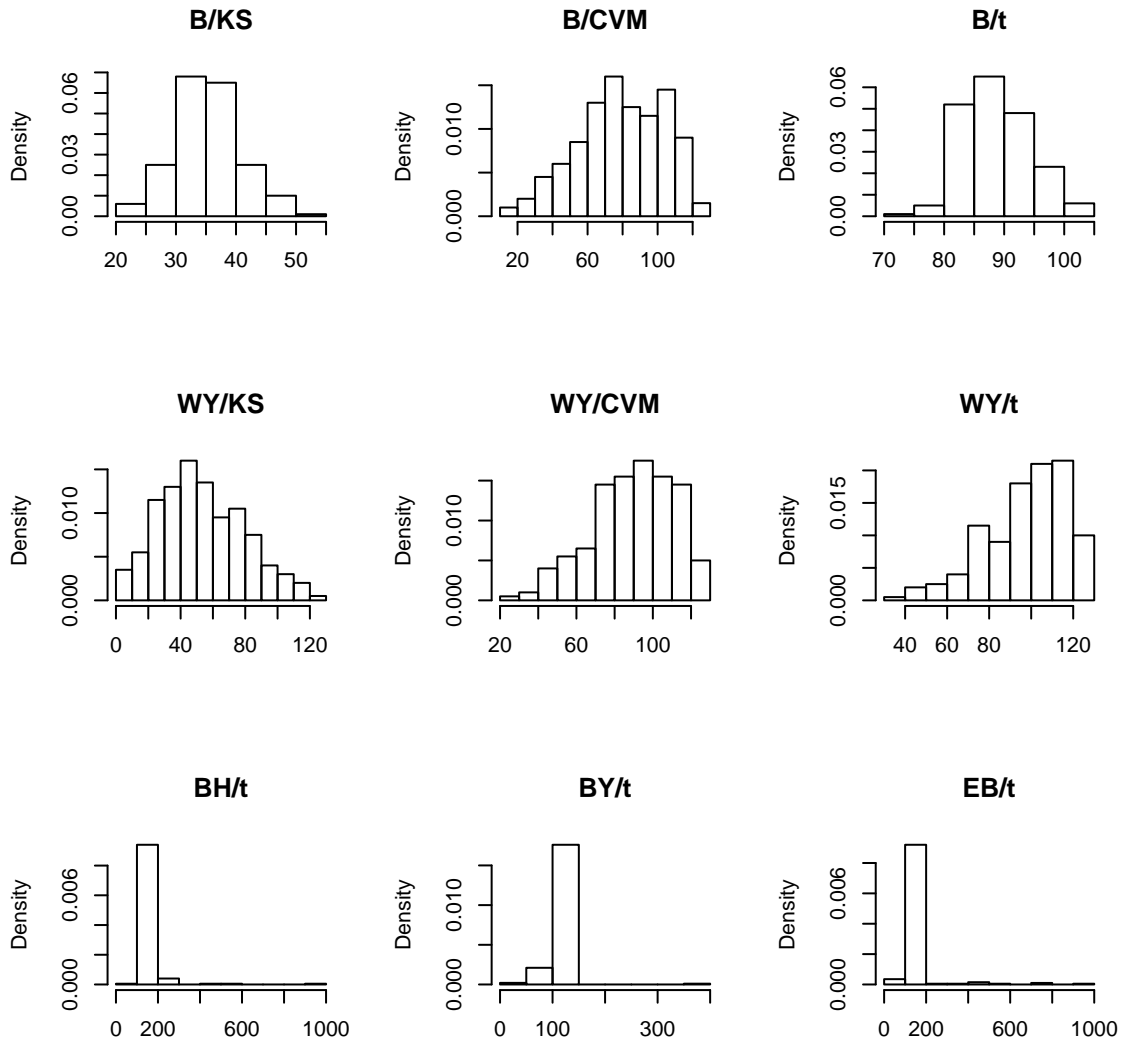

Figure 2: Histograms of the number of selected genes across 200 simulation runs constructed for S15COR.

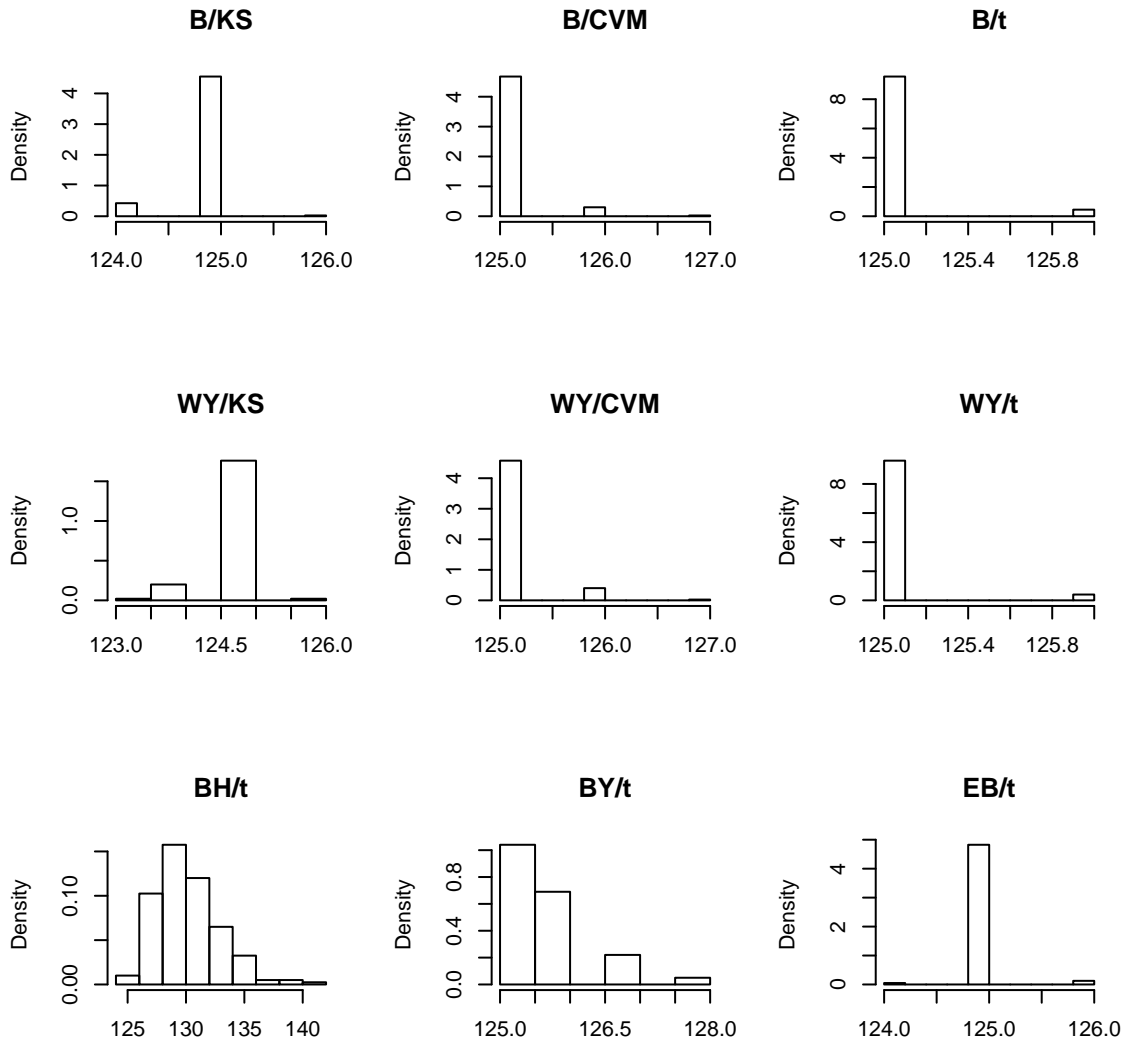

Figure 3: Histograms of the number of selected genes across 200 simulation runs constructed for S43.

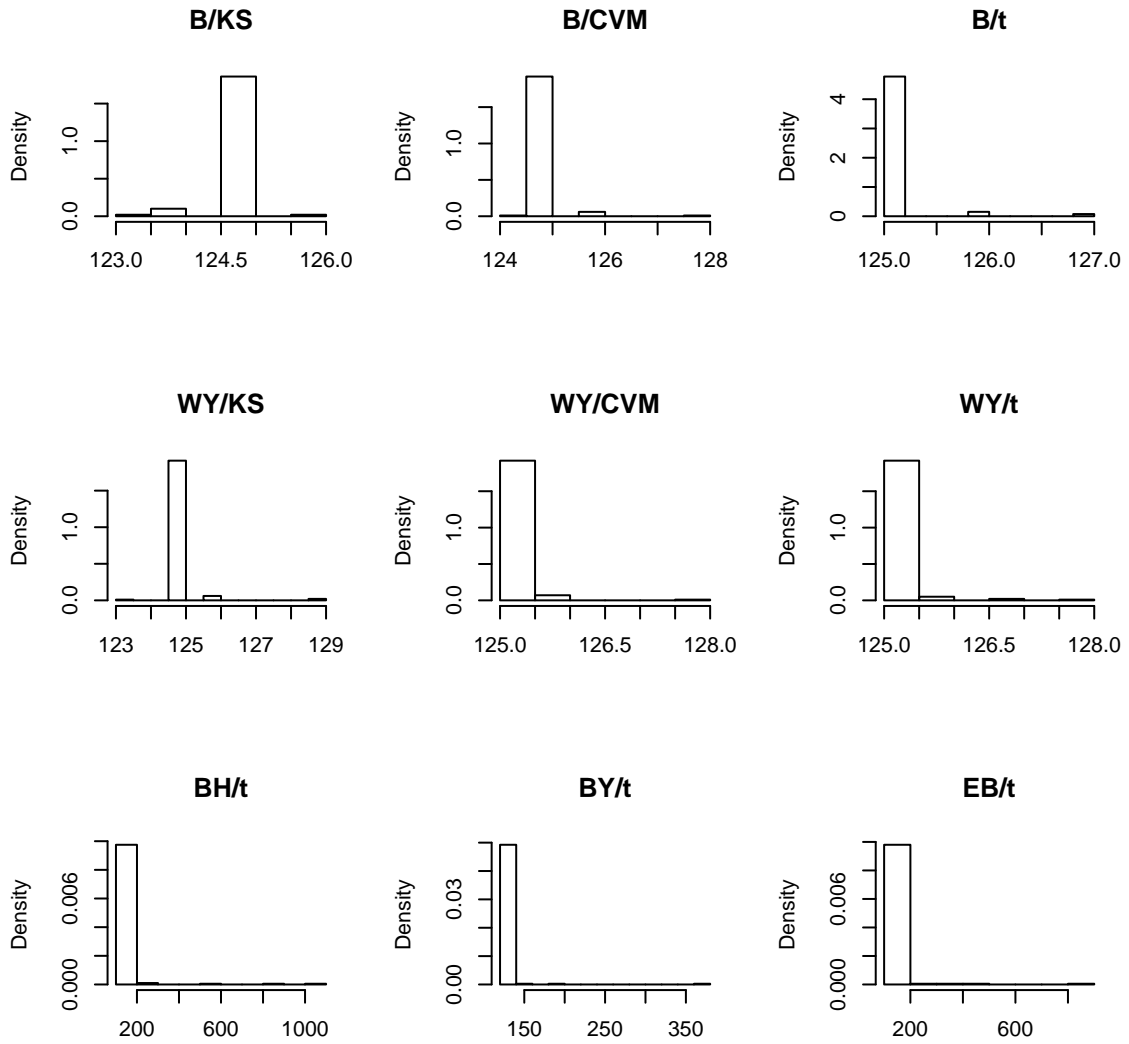

Figure 4: Histograms of the number of selected genes across 200 simulation runs constructed for S43COR.
